# Supplementary material for: Inactivation of the Mla system and outer-membrane phospholipase A results in disrupted outer-membrane lipid asymmetry and hypervesiculation in Bordetella pertussis
Source: PubMed Central journal article supplement — Curr Res Microb Sci. 2022 Nov 12;3:100172. doi: 10.1016/j.crmicr.2022.100172 (PMC9743053; doi:10.1016/j.crmicr.2022.100172), 2022-11-12
Supplement: mmc1.pdf [file mmc1.pdf]

**Table S1.** Strains used in this study.

| Strain                                | Description <sup>a</sup>                                                                                            | Reference                  |
|---------------------------------------|---------------------------------------------------------------------------------------------------------------------|----------------------------|
| <i>E. coli</i>                        |                                                                                                                     |                            |
| <b>DH5α</b>                           | F <sup>-</sup> , Δ( <i>lacZYA-argF</i> )U169 <i>thi-1 hsdR17 gyrA96 recA1 endA1 supE44 relA1 phoA Φ80 dlacZΔM15</i> | Hanahan, 1983              |
| <b>SM10λpir</b>                       | <i>thi thr leu fhuA lacY supE recA::RP4-2-Tc::Mu λpir</i><br>R6K Kan <sup>R</sup>                                   | Miller and Mekalanos, 1988 |
| <i>B. pertussis</i>                   |                                                                                                                     |                            |
| <b>B213</b>                           | Sm <sup>R</sup> derivative of Tohama I                                                                              | King et al., 2001          |
| <b>B213 Δ<i>mlaF</i></b>              | Δ <i>mlaF::gm</i> mutant of B213, Gm <sup>R</sup>                                                                   | This study                 |
| <b>B213 Δ<i>plda</i></b>              | Δ <i>plda::gm</i> mutant of B213, Gm <sup>R</sup>                                                                   | This study                 |
| <b>B213 Δ<i>mlaF</i> Δ<i>plda</i></b> | Δ <i>plda::gm</i> mutant of B213 Δ <i>mlaF</i> , Gm <sup>R</sup>                                                    | This study                 |
| <b>B213 Δ<i>pqiAB</i></b>             | Δ <i>pqiAB::gm</i> mutant of B213, Gm <sup>R</sup>                                                                  | This study                 |
| <i>B. bronchiseptica</i>              |                                                                                                                     |                            |
| <b>BB-D09-SR</b>                      | Sm <sup>R</sup> derivative of BB-D09                                                                                | de Jonge et al., 2021      |
| <b>BB-D09-SR Δ<i>mlaF</i></b>         | Δ <i>mlaF::gm</i> mutant of BB-D09-SR, Gm <sup>R</sup>                                                              | This study                 |

<sup>a</sup>Sm<sup>R</sup>, streptomycin resistant; Gm<sup>R</sup>, gentamicin resistant; Kan<sup>R</sup>, kanamycin resistant

**Table S2.** Primers used in this study.

| Name                  | Sequence <sup>a</sup>            | Restriction site |
|-----------------------|----------------------------------|------------------|
| <b>mlaF_up_Fw</b>     | AACTACGATGCGCAGAAAGACC           |                  |
| <b>mlaF_up_Rev</b>    | AAGTCGACAGCTATTGCGGGTATGAACG     | SalI             |
| <b>mlaF_down_Fw</b>   | AAGTCGACACAACAAGAAGGACGCAAGC     | SalI             |
| <b>mlaF_down_Rev</b>  | AATCGTGACATGATGAATCCGTA          |                  |
| <b>pldA_up_Fw</b>     | ATCGCCGATACCCTGGTC               |                  |
| <b>pldA_up_Rev</b>    | GCGCGCGTCGACTCGAGCCGGTAGGAAATG   | SalI             |
| <b>pldA_down_Fw</b>   | GCGCGCGTCGACCTGGACATGAACGGCTACCT | SalI             |
| <b>pldA_down_Rev</b>  | CGGCATGATCTGGTAAAATAA            |                  |
| <b>pqiAB_up_Fw</b>    | GAGGCCATCACCAAGCAG               |                  |
| <b>pqiAB_up_Rev</b>   | TAGCCTCAGGTTGGCCAGCACGAAGAC      | Eco81I           |
| <b>pqiAB_down_Fw</b>  | TAGCCTGAGGCGTTGTTGAAAGGGC        | Eco81I           |
| <b>pqiAB_down_Rev</b> | CGGTGGAACCGTATCCTAAAG            |                  |
| <b>Gm_Fw_S</b>        | GCGCGCGTCGACGACGCACACCGTGGAAA    | SalI             |
| <b>Gm_Rev_S</b>       | GCGCGCGTCGACGCGGCGTTGTGACAATTT   | SalI             |
| <b>Gm_Fw_E</b>        | GCGCGCCCTGAGGGACGCACACCGTGGAAA   | Eco81I           |
| <b>Gm_Rev_E</b>       | GCGCGCCCTCAGGGCGGCGTTGTGACAATTT  | Eco81I           |

<sup>a</sup>Recognition sites for the restriction enzymes indicated in the last column are underlined

**Table S3.** Plasmids used in this study.

| <b>Plasmid</b>                          | <b>Description<sup>a</sup></b>                                                        | <b>Reference</b>           |
|-----------------------------------------|---------------------------------------------------------------------------------------|----------------------------|
| <b>pCRII</b>                            | TA cloning vector, Amp <sup>R</sup> , Kan <sup>R</sup>                                | Invitrogen                 |
| <b>pYRC</b>                             | pBBR1MCS-5, <i>lacI</i> , Gm <sup>R</sup>                                             | Arts et al., 2007          |
| <b>pKAS32</b>                           | Allelic-exchange suicide vector, Amp <sup>R</sup>                                     | Skorupski and Taylor, 1996 |
| <b>pKAS32-<i>miaF</i><sub>KO</sub></b>  | pKAS32 carrying an <i>miaF</i> knockout construct, Amp <sup>R</sup> , Gm <sup>R</sup> | This study                 |
| <b>pKAS32-<i>pldA</i><sub>KO</sub></b>  | pKAS32 carrying a <i>pldA</i> knockout construct, Amp <sup>R</sup> , Gm <sup>R</sup>  | This study                 |
| <b>pKAS32-<i>pqiAB</i><sub>KO</sub></b> | pKAS32 carrying a <i>pqiAB</i> knockout construct, Amp <sup>R</sup> , Gm <sup>R</sup> | This study                 |

<sup>a</sup>Amp<sup>R</sup>, ampicillin resistant; Kan<sup>R</sup>, kanamycin resistant; Gm<sup>R</sup>, gentamicin resistant

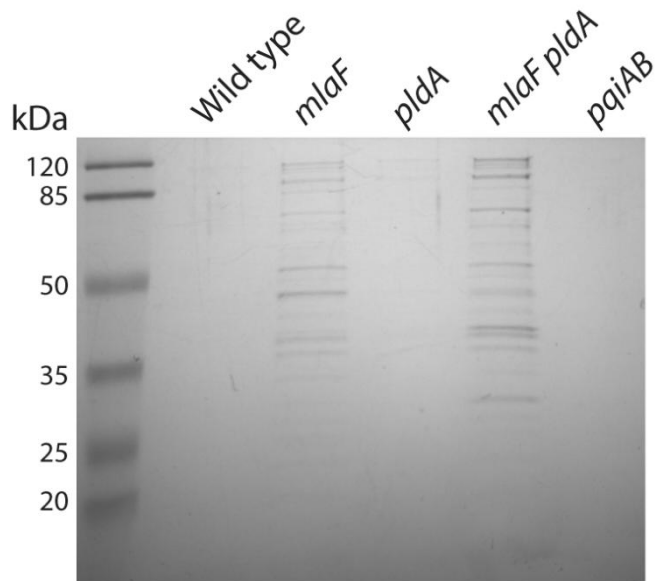

**Fig. S1.** OMV release by *B. pertussis* strain B213 and its mutant derivatives after growth in conical tubes. Bacteria were grown for 24 h in Verwey medium, and OMVs were isolated from equal amounts of cells, based on OD<sub>600</sub>. OMVs were analyzed by SDS-PAGE, and the proteins were stained with the Bradford reagent. Molecular weight markers are indicated on the left.

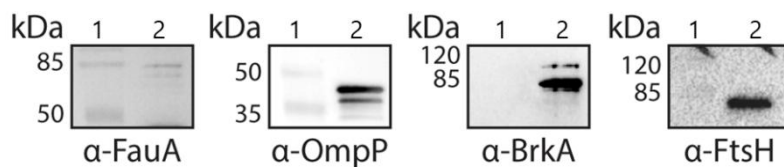

**Fig. S2.** Detection of various proteins in whole-cell lysates. Whole-cell lysates of wild-type *B. pertussis* strain B213 were analyzed by Western blotting using antisera directed against FauA (78 kDa), OmpP (39 kDa), BrkA (73 kDa), and FtsH (69 kDa) as indicated below the different panels. Lanes 1 contain molecular weight standard proteins, the molecular masses of which are shown at the left. Lanes 2 contain the whole-cell lysates.

## References

- Arts, J., de Groot, A., Ball, G., Durand, E., El Khattabi, M., Filloux, A., Tommassen, J., Koster, M., 2007. Interaction domains in the *Pseudomonas aeruginosa* type II secretory apparatus component XcpS (GspF). *Microbiology* 153, 1582–1592. doi:10.1099/mic.0.2006/002840-0
- de Jonge, E.F., Balhuizen, M.D., van Boxtel, R., Wu, J., Haagsman, H.P., Tommassen, J., 2021. Heat shock enhances outer-membrane vesicle release in *Bordetella* spp. *Curr. Res. Microb. Sci.* 2, 100009. doi:10.1016/j.crmicr.2020.100009
- Hanahan, D., 1983. Studies on transformation of *Escherichia coli* with plasmids. *J. Mol. Biol.* 166, 557–580. doi:10.1016/S0022-2836(83)80284-8
- King, A.J., Berbers, G., van Oirschot, H.F.L.M., Hoogerhout, P., Knipping, K., Mooi, F.R., 2001. Role of the polymorphic region 1 of the *Bordetella pertussis* protein pertactin in immunity. *Microbiology* 147, 2885–2895. doi:10.1099/00221287-147-11-2885
- Miller, V.L., Mekalanos, J.J., 1988. A novel suicide vector and its use in construction of insertion mutations: osmoregulation of outer membrane proteins and virulence determinants in *Vibrio cholerae* requires *toxR*. *J. Bacteriol.* 170, 2575–2583. doi:10.1128/jb.170.6.2575-2583.1988
- Skorupski, K., Taylor, R.K., 1996. Positive selection vectors for allelic exchange. *Gene* 169, 47–52. doi:10.1016/0378-1119(95)00793-8
